# Supplementary material for: Entorhinal Principal Neurons Mediate Brain-stimulation Treatments for Epilepsy
Source: PubMed Central journal article supplement (PMC5161446; doi:10.1016/j.ebiom.2016.11.027), 2016-11-23
Supplement: mmc1.pdf [file mmc1.pdf]

---

## 1 **Supplementary data**

### 2 **Title: Entorhinal principal neurons mediate brain-stimulation treatment for epilepsy**

3

#### 4 **1. Supplementary Materials and Methods**

##### 5 *1.1 Stereotactic surgery*

6 The mice were anesthetized using sodium pentobarbital (60 mg/kg, intraperitoneally (i.p.),  
7 Sigma-Aldrich). The stimulating electrode was made of twisted Teflon-coated tungsten wires  
8 (795500; diameter, 0.05 mm; A.M. Systems), and the guide cannulas had a 0.48-mm outer  
9 diameter and 0.34-mm inside diameter (62003, RWD Life Science). The animals were kept on  
10 a heating pad until recovery from anesthesia. Stereotactic implantations were based on the  
11 following coordinates in mm relative to bregma:

12 (a) To photo-activate entorhinal neurons in *VGAT-ChR2-eYFP* and *CaMKII $\alpha$ -ChR2<sup>EC</sup>*  
13 mice, we implanted a stimulating electrode into the right ventral hippocampus (AP, -2.9; ML,  
14 -2.75 to -3.25; ventral V, -3.0) based on the mouse brain atlas (Paxinos and Franklin, 2001),  
15 and a guide cannula into the right EC (AP, -4.36 to -4.84; ML, -2.76 to -3.24; V, -3.5) to aid in  
16 inserting an optical fiber (diameter, 200  $\mu$ m; Thor Labs) during experiments (detailed below).  
17 The coordinates used for the insertion of the optical fiber tip were approximately AP, -4.6; ML,  
18 -3.0; and V, -3.7. This surgery protocol was also used for the kindling acquisition experiments  
19 in *VGAT-ChR2<sup>EC</sup>* mice.

20 (b) For entorhinal electrical stimulation experiments, male wild-type littermates (WT,  
21 C57BL/6 background, 20-30 g) were used. A stimulating electrode was implanted into the right

---

1 ventral hippocampus for the kindling stimulation experiments, and another stimulating  
2 electrode was implanted into the right EC (AP, -4.6; L, -2.75 to -3.25; V, -4.2) for brain  
3 stimulation treatment experiments. For the rats, the coordinates used to reach the ventral  
4 hippocampus (AP, -4.8; L, -5.3; V, -6.3) and the EC (AP, -8.1; L, -4.0; V, -6.0) were based on  
5 the rat brain atlas (Paxinos and Watson, 2004).

6 (c) To apply simultaneous photo- and electrical stimulation to the EC in *CaMKII $\alpha$ -*  
7 *eNPHR3.0<sup>EC</sup>* and *VGAT-ChR2<sup>EC</sup>* mice, a stimulating electrode was implanted into the right EC  
8 (AP, -4.7; ML, -2.75 to -3.25; V, -4.2) with a guide cannula (AP, -4.12 to 4.6; ML, -2.76 to -  
9 3.24; V, -3.5). The guide cannula was glued to the stimulating electrode, the tip of which  
10 extended 0.7 mm beyond the end of the cannula. In addition, another stimulating electrode was  
11 implanted into the right ventral hippocampus (AP, -2.9; ML, -2.75 to -3.25, V, -3.0) for  
12 kindling.

13 (d) To photo-activate entorhinal projection fibers in the lacunosum-moleculare layer  
14 (LMOL) of the hippocampus, we implanted a stimulating electrode into the right ventral  
15 hippocampus (AP, -2.9; ML, -2.75 to -3.25; V, -3.0) with a guide cannula (about AP, -3.0; ML,  
16 -2.76 to -3.24; V, -1.8) above the hippocampal LMOL. The stimulating electrode was glued to  
17 a guide cannula, and the tip of the stimulating electrode extended 1.2 mm beyond the end of  
18 the cannula.

19 (e) To photo-activate GABAergic neurons in the kindling focus, we implanted a bipolar  
20 electrode into the right ventral hippocampus (AP, -2.9; ML, -2.75 to -3.25; V, -3.0) of *VGAT-*  
21 *ChR2-eYFP* mice with a guide cannula. The cannula was glued to the stimulating electrode,

---

1 and the tip of the stimulating electrode extended 0.7 mm beyond the end of the cannula. The  
2 coordinates of the inserted optical fiber tip placed it approximately 0.5 mm above the tip of the  
3 kindling electrode (AP, -3.2; ML, -3.0; V, -2.5) during the experiments. In addition, another  
4 stimulating electrode was implanted into the right EC (AP, -4.6; L, -2.75 to -3.25; V, -4.2) to  
5 deliver LFES.

6 (f) To deliver drugs to the hippocampus during entorhinal LFES, we implanted a  
7 stimulating electrode into the right ventral hippocampus (AP, -2.9; ML, -2.75 to -3.25; V, -3.0)  
8 with a guide cannula (about AP, -3.0; ML, -2.76 to -3.24; V, -2.2). The guide cannula was  
9 glued to the stimulating electrode, and the tip of the stimulating electrode extended 0.8 mm  
10 beyond the end of the cannula. Finally, the coordinates of the injection needle tip placed it 0.5  
11 mm from the cannula (i.e., 0.3 mm above the stimulating electrode tip (AP, -3.2; ML, -3.0; V,  
12 -2.7) during drug delivery.

13

#### 14 *1.2 Hippocampus EEG recording and analysis*

15 Raw electroencephalogram (EEG) signals were recorded with band-pass filters spanning  
16 0.5 to 100 Hz and sampled at 1000 Hz with a digital amplifier (NuAmps, Neuroscan System,  
17 USA). Recorded EEGs were direct-current shifted, digitally band-pass filtered from 0.5 to 100  
18 Hz by Scan 4.5. Finally, the EEG data were imported into Labchart 7.0 software, where the  
19 power spectrum was performed using fast Fourier transform with a Hanning window. Ictal  
20 events were defined as regular spike clusters with a duration of  $\geq 20$  s, spike frequency of  $\geq 2$   
21 Hz and amplitude at least three times of the baseline EEG. Interictal spikes were defined as

---

1 regular spikes with a spike frequency  $< 2$  Hz and an amplitude at least three times of that of  
2 the baseline EEG.

3

### 4 *1.3 Pilocarpine model of epilepsy*

5 Scopolamine methyl bromide (2 mg/kg, i.p.; Sigma-Aldrich) was injected 30 min before  
6 pilocarpine administration to block peripheral side-effects. Pilocarpine hydrochloride (260  
7 mg/kg, i.p.; Sigma) was then injected, and the animals were continuously monitored for  
8 behavioral seizures. Diazepam (4 mg/kg, i.p.; Sigma-Aldrich) was used to terminate status  
9 epilepticus after 60 min of continuous seizures to standardize the duration of seizure activity.

10 At one month after pilocarpine administration, electrodes were implanted into the right ventral  
11 hippocampus and EC as described above.

12 After 7 days of recovery, the surviving mice were divided into two groups: one group  
13 received entorhinal LFES, and the other group received sham LFES. LFES was delivered using  
14 a cycle of 15 min 'on' and 15 min 'off' for 4 h every day for 7 days (Fig. S1d).

15

### 16 *1.4 Behavioral tasks*

17 Behavioral tasks, including object recognition memory tests, passive avoidance test and  
18 fear-conditioning tests, were performed 24 h after the completion of 7 days of LFES treatment  
19 (once per day) in kindled mice.

20 The novel object recognition and spatial object memory tests were performed as  
21 previously described (Favrais et al., 2011; Wang et al., 2016). The novel object recognition

---

1 and spatial object memory tests were performed as previously described<sup>65</sup>. Briefly, each animal  
2 was trained in a session by exposure to two identical, non-toxic objects (glass or hard plastic  
3 items) that were placed in the rear left and right corners of a 30 × 30 × 45 cm square arena.  
4 After this session, the animal was returned to its home cage for a 30-min retention interval. For  
5 novel object recognition tests, each animal was lowered into a testing arena in which one  
6 familiar object had been replaced by a novel object. For spatial object memory tests, each  
7 animal was lowered into a testing arena in which one familiar object had been moved. Each  
8 session was video-recorded, and the animal was given 4 min to explore. Exploration was  
9 defined as either pointing its nose toward the object at a distance of < 2 cm and/or touching it  
10 with the nose, whereas turning around, climbing, and sitting on an object were not considered  
11 to be exploration. The discrimination ratio was calculated as the time spent with the novel  
12 object divided by the total time spent in exploring either object. The objects to be discriminated  
13 were green cubes, blue pyramids, and red cylinders that were 5.8 cm high. The objects were  
14 randomized and counterbalanced across animals and groups. Objects and arenas were  
15 thoroughly cleaned with 70% ethanol between trials to remove olfactory cues.

16 Passive avoidance testing was conducted using a 3-day paradigm, as previously described  
17 (King et al., 2003). Day 1: mice explored the apparatus for 5 min. Day 2 (training): mice were  
18 placed in the lighted chamber, and their latency to enter the dark chamber was recorded for a  
19 maximum of 5-min. On entering the dark chamber, the mice received a mild, inescapable foot-  
20 shock (0.5 mA, 2 s) and were then kept in the dark chamber for 1 min. Day 3 (test): the mice  
21 were placed in the lighted chamber, and their latency to enter the dark chamber was recorded.

---

1        Fear-conditioning procedures were performed as previously described (Liu et al., 2007).  
2        Briefly, mice were given two 3-min preconditioning handling sessions. For training on day 1,  
3        the mice were placed in the testing chamber, and a training tone (84 dB, 2.8 kHz, 30 s) was  
4        activated 2 min later. Two seconds before the end of the tone, a 2-s foot-shock (1 mA) was  
5        delivered. The mouse was returned to its home cage 30 s after the shock. For contextual fear  
6        testing, on day 2, the mice were placed back into the same chamber for 5 min, and the  
7        percentage of time spent freezing was estimated by scoring the presence or absence of non-  
8        respiratory movement every 5 s during 5 min. For cued fear testing on day 3, the mice were  
9        placed into a different box that contained visual, tactile, and olfactory cues that were distinct  
10       from those in the training apparatus. The training tone (84 dB, 2.8 kHz, 3 min) was activated  
11       2 min later, and the percentage of time spent freezing was estimated during 3 min with the  
12       training tone.

---

## 1 2. Supplementary results

### 2 2.1 Entorhinal LFES relieved behavioral deficits in kindled mice (for Fig. S4)

3 To investigate whether entorhinal LFES affects seizure related behavioral deficits, we  
4 tested the effect of repeated entorhinal LFES on behavioral performance of three memory tests  
5 in kindled mice. We found behavioral performance on these memory tests is impaired in  
6 kindled mice, including contextual fear memory ( $p = 0.015$  compared to sham-control,  $n = 11$   
7 for both kindled-control and sham-control groups; one-way ANOVA followed by the LSD *post*  
8 *hoc* test was used; Fig. S4a, left), cued fear memory ( $p = 0.013$  compared to sham-control;  $n$   
9  $= 11$  for both kindled-control and sham-control groups; one-way ANOVA followed by the  
10 LSD *post hoc* test was used; Fig. S4a, right), passive avoidance memory tests ( $p = 0.004$   
11 compared to sham-control;  $n = 10$  for kindled-control and  $n = 11$  for sham-control; one-way  
12 ANOVA followed by the LSD *post hoc* test was used; Fig. S4b), novel object recognition ( $p =$   
13  $0.776$  compared to baseline T0 for kindled group, while  $p = 0.033$  compared to baseline T0 for  
14 sham group;  $n = 11$  for kindled-control and  $n = 10$  for sham-control group; paired t test was  
15 used; Fig. S4c) and spatial object recognition ( $p = 0.776$  compared to baseline T0 for kindled  
16 group, while  $p = 0.003$  compared to baseline T0 for sham group,  $n = 11$  for kindled-control and  
17  $n = 10$  for sham-control group; paired t test was used; Fig. S4c). Repeated entorhinal LFES  
18 relieved behavioral deficits in contextual fear memory ( $p = 0.010$  compared to kindled-control  
19  $n = 11$  for LFES EC group *vs*  $n = 11$  for kindled-control; one-way ANOVA followed by the  
20 LSD *post hoc* test was used; Fig. S4a, left), cued fear memory ( $p = 0.037$  compared to kindled-  
21 control;  $n = 11$  for LFES EC group *vs*  $n = 11$  for control; one-way ANOVA followed by the

---

1 LSD *post hoc* test was used; Fig. S4a, right), passive avoidance tests ( $p < 0.001$  compared to  
2 kindled-control;  $n = 11$  for LFES EC group vs  $n = 11$  for control; one-way ANOVA followed  
3 by the LSD *post hoc* test was used; Fig. S4b) and spatial object recognition ( $p = 0.014$   
4 compared to T0 by paired t test;  $n = 10$  for LFES EC group; Fig. S4c), but it did not relieved  
5 behavioral deficits in novel object recognition tests ( $p = 0.906$  compared to T0 by paired t test;  
6  $n = 10$  for LFES EC group; Fig. S4c). It has been found that the novel object memory may be  
7 the perirhinal cortex dependent rather than hippocampal dependent (Kinnavane et al., 2016).  
8 LFES relieved behavioral deficits in fear memory, passive avoidance memory and spatial  
9 object recognition test but not in novel object recognition test, suggesting there are important  
10 limits to LFES treatment depending on the type of cognitive deficits.

11 Similar to LFES, repeated photo-activation (473 nm, 1 Hz) of entorhinal CaMKII $\alpha$   
12 neurons also relieved behavioral deficits in contextual fear memory ( $p = 0.018$  compared to  
13 kindled-control,  $n = 5$  for light-EC group and  $n = 11$  for both kindled-control; one-way  
14 ANOVA followed by the LSD *post hoc* test was used; Fig. S4a, left), cued fear memory ( $p =$   
15  $0.015$  compared to kindled-control,  $n = 5$  for light-EC group and  $n = 11$  for both kindled-control;  
16 one-way ANOVA followed by the LSD *post hoc* test was used; Fig. S4a, right) and passive  
17 avoidance tests ( $p < 0.001$  compared to kindled-control,  $n = 6$  for light-EC group and  $n = 10$   
18 for both kindled-control; one-way ANOVA followed by the LSD *post hoc* test was used; Fig.  
19 S4c).

20



---

1 2.2 Activation of entorhinal GABAergic neurons promoted hippocampal seizures in transgenic  
2 VGAT-ChR2-eYFP mice (for Fig. S5)

3 GABAergic neurons are the other important sub-type of neurons in the EC. To investigate  
4 the role of entorhinal GABAergic neurons in hippocampal seizures and in the antiepileptic  
5 effect of entorhinal LFES, we first used transgenic *VGAT-ChR2-eYFP* mice<sup>38</sup>. As shown in Fig.  
6 S4, low-frequency blue light stimulation (473 nm, 1 Hz) in the EC had no antiepileptic effect  
7 in *VGAT-ChR2<sup>EC</sup>* mice, although it did activate interneurons (INs) similar to LFES (Fig. S5b).  
8 High-frequency blue light stimulation (473 nm, 20 Hz) inhibited entorhinal principal neurons  
9 (PNs, Fig. S5c), accelerated hippocampal kindling acquisition ( $p = 0.026$  for seizure stage  
10 compared to control, two-way ANOVA for repeated measures followed by LSD *post hoc* test  
11 was used. Fig. S5d) and prolonged the ADD of kindled seizures ( $48.88 \pm 4.33$  for light vs  $29.25$   
12  $\pm 3.06$  for pre-stimulation baseline,  $p < 0.001$ , paired t test,  $t = 5.921$   $df = 7$ ,  $n = 8$ ; Fig. S5e).  
13 Representative EEGs showing that blue light stimulation prolonged the ADD of kindled  
14 seizures in *VGAT-ChR2-eYFP* mice (Fig. S5f).

15 Because ChR2-eYFP was globally expressed in the brain, especially in the cerebellum,  
16 photo-stimulation of the EC may activate the pass by fibers as well as the cerebellar cells/axons  
17 in transgenic *VGAT-ChR2-eYFP* mice. Hence, to exclude these potentially confounding factors,  
18 we stereotactically injected an AAV encoding Cre-dependent ChR2 into the EC of *VGAT-Cre*  
19 mice to selectively modulate GABAergic neurons, as described in Fig. 2.

---

### 1 2.3 LFS at the EC modulated optogenetic identified hippocampal neurons in VGAT-ChR2 mice

2 (for Fig. S7)

3 As classification of neurons by the spike waveform and autocorrelograms seems empirical,  
4 we further identified hippocampal INs accurately using an optogenetic strategy in VGAT-  
5 ChR2-eYFP mice. The neurons that entrained by 20 Hz blue light stimulation were identified  
6 as INs (named light+ neuron, Fig. S7a), while neurons that inhibited by 20 Hz blue light  
7 stimulation were identified as non-INs (named light- neuron, Fig. S7a). Finally, 11 INs and  
8 36 non-INs were recorded. When delivering LFS at the EC, 7 INs showed excited response, 4  
9 INs showed inhibited response, 9 non-INs showed excited response and 25 non-INs showed  
10 inhibited response (Fig. S7b). The ratio of type2/type1 in INs is much higher than that in non-  
11 INs ( $p = 0.029$ ,  $\chi^2$  test,  $\chi^2 = 5.601$ ; Fig. S7c).

### 13 2.4 Hippocampal GABA receptor involved in the effects of LFES (for Fig. S11)

14 It has been reported that inhibition of focal PNs in the hippocampus inhibits seizures  
15 (Krook-Magnuson et al., 2013; Tonnesen et al., 2009), and selective activation of hippocampal  
16 PNs directly induces seizures (Alexander et al., 2009). These previous results, together with  
17 our extracellular recording data in Fig. 6, suggest that it is possible that entorhinal LFES  
18 induces its antiepileptic effect by activating specific inhibitory mechanism in the hippocampus  
19 (such as the hippocampal GABAergic system). To investigate whether the hippocampal  
20 GABAergic system contributes to the inhibitory and antiepileptic effects of entorhinal LFES,  
21 we injected GABA receptor antagonists into the hippocampus (Fig. S11a). We found that

---

1 injecting the GABA receptor antagonists bicuculline (5  $\mu\text{g}$  in 1  $\mu\text{L}$ , a critical sub-convulsive  
2 dose) or CGP35348 (5  $\mu\text{g}$  in 1  $\mu\text{L}$ , a sub-convulsive dose) shorted the inhibitory duration of  
3 hippocampal neurons which induced by entorhinal LFES ( $p = 0.038$  for bicuculline compare  
4 to baseline,  $n = 13$ , paired t test,  $t = 2.438$ ,  $df = 9$ .  $p < 0.001$  for CGP35348 compare to baseline,  
5  $n = 6$ , paired t test,  $t = 8.490$ ,  $df = 5$ ; Fig. S11c). CGP35348 also abolished the antiepileptic  
6 effect of entorhinal LFES (Fig. S11d). Interestingly, CGP35348 seemed to be much more  
7 effective than bicuculline in attenuating both the inhibitory and antiepileptic effects of  
8 entorhinal LFES (two-way ANOVA for repeated measures followed by LSD *post hoc* test; Fig.  
9 S11c and d). In addition, a high dose of CGP35348 (20  $\mu\text{g}$  in 1  $\mu\text{L}$ ) reversed the antiepileptic  
10 entorhinal LFES into seizure-promoting. These results indicate that the hippocampal  
11 GABAergic system is required for the anti-epileptic effect of LFES.

12

## 1 2. Supplementary Figure

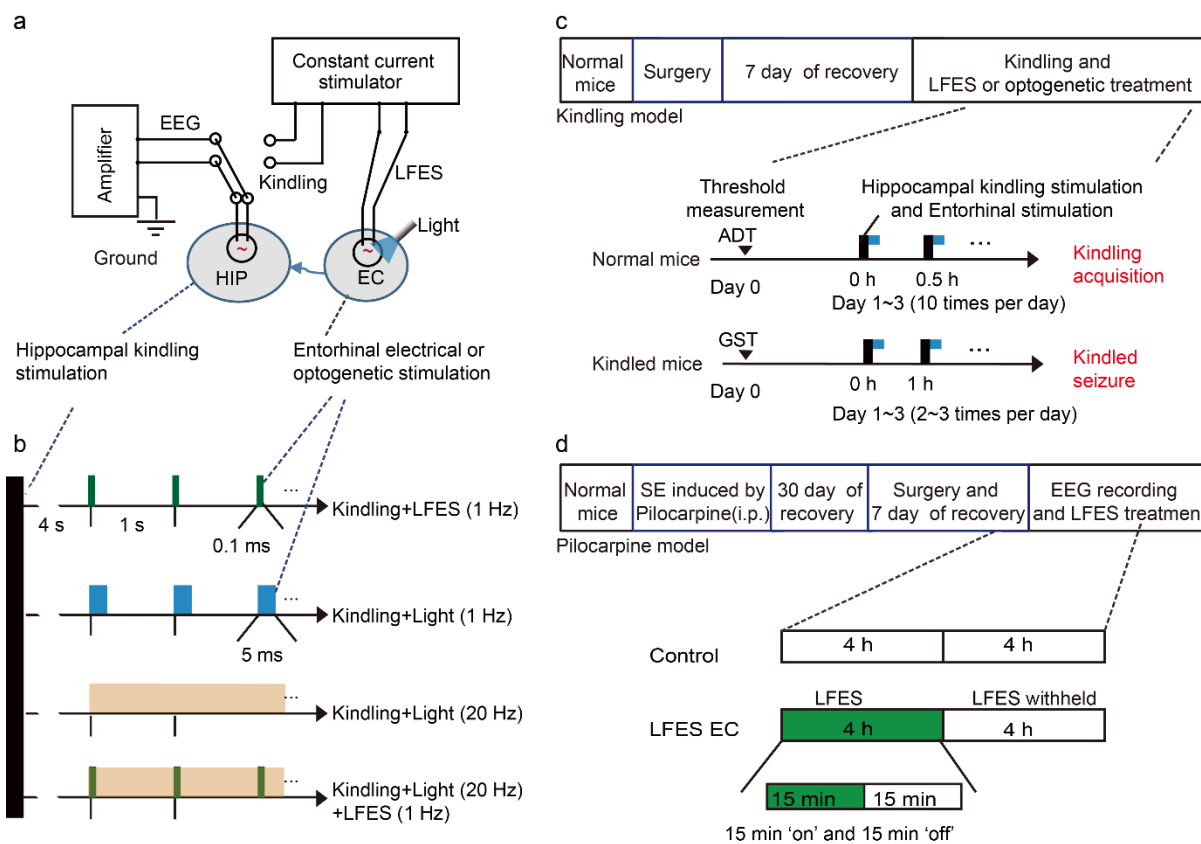

**Fig. S1.** Schematic of experimental protocol. a) A schematic of the devise for kindling and electrical brain stimulation. b) Examples of LFES, low-frequency and high-frequency optical stimulation in kindling model, in which entorhinal stimulations were delivered ~4 s after the kindling stimulation (about the appearance of AD). Black rectangle indicates kindling stimulation, the green rectangle indicates a pulse of LFES, the blue rectangle indicates a pulse of blue optical stimulation, and the yellow rectangle indicates a trail of yellow optical stimulation. c) The experimental protocol for testing the effect of LFES in kindling model. In kindling acquisition experiments, we used 10 stimulations a day for three days in normal mice. In kindled seizure experiments, we used two or three stimulations a day for one to three days. Black rectangle indicates kindling stimulation while the blue rectangle indicates blue optical

1 stimulation. d) The experimental protocol for testing the effect of LFES in pilocarpine mouse  
 2 model. That is, LFES (1 Hz) was delivered using a cycle of 15 min 'on', and 15 min 'off' for  
 3 4 h every day and EEG was recorded 8 h every day. Green rectangle indicates LFES.

4

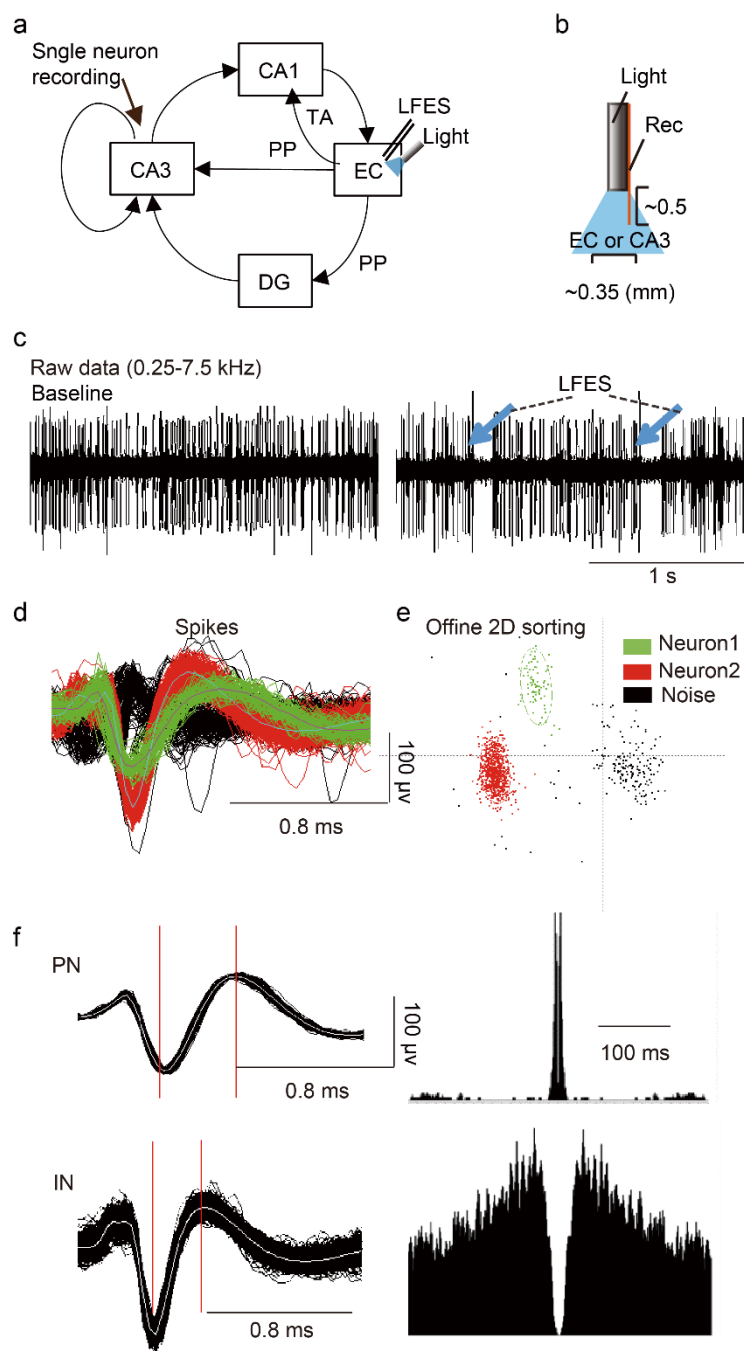

5

6 **Fig.S2.** Schematic of neuron recording and analysis. a) A Schematic of EC-hippocampal curits.

7 b) The electrode design used for extracellular unit recordings during optical stimulation. c)

1 Recorded raw data (0.25-7 kHz) in the CA3. Left: baseline; Right: during entorhinal LFES. d)  
2 The picked waveform of recorded neurons. e) The 2-D clustered spike sorting. f) Classifying  
3 the recorded neurons according to their waveforms and autocorrelation patterns. The red line  
4 indicate the method for measurement of the spike widths.

5

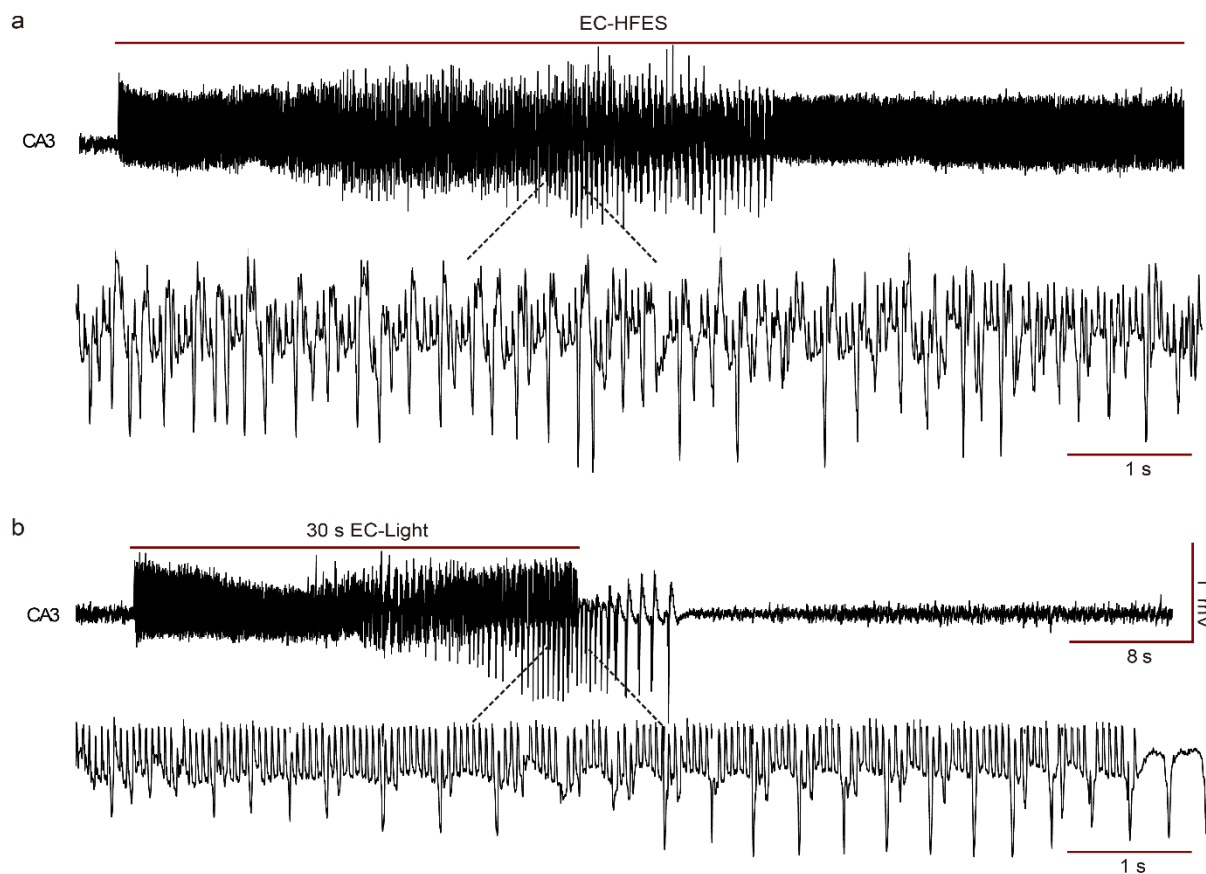

6

7 **Fig. S3.** Entorhinal HFES and high-frequency light activation of entorhinal PNs induce  
8 seizures. a) Entorhinal HFES induce seizure in a WT mice; b) high-frequency light activation  
9 of entorhinal PNs induce seizure in a *CaMKII $\alpha$ -ChR2<sup>EC</sup>* mice.

10



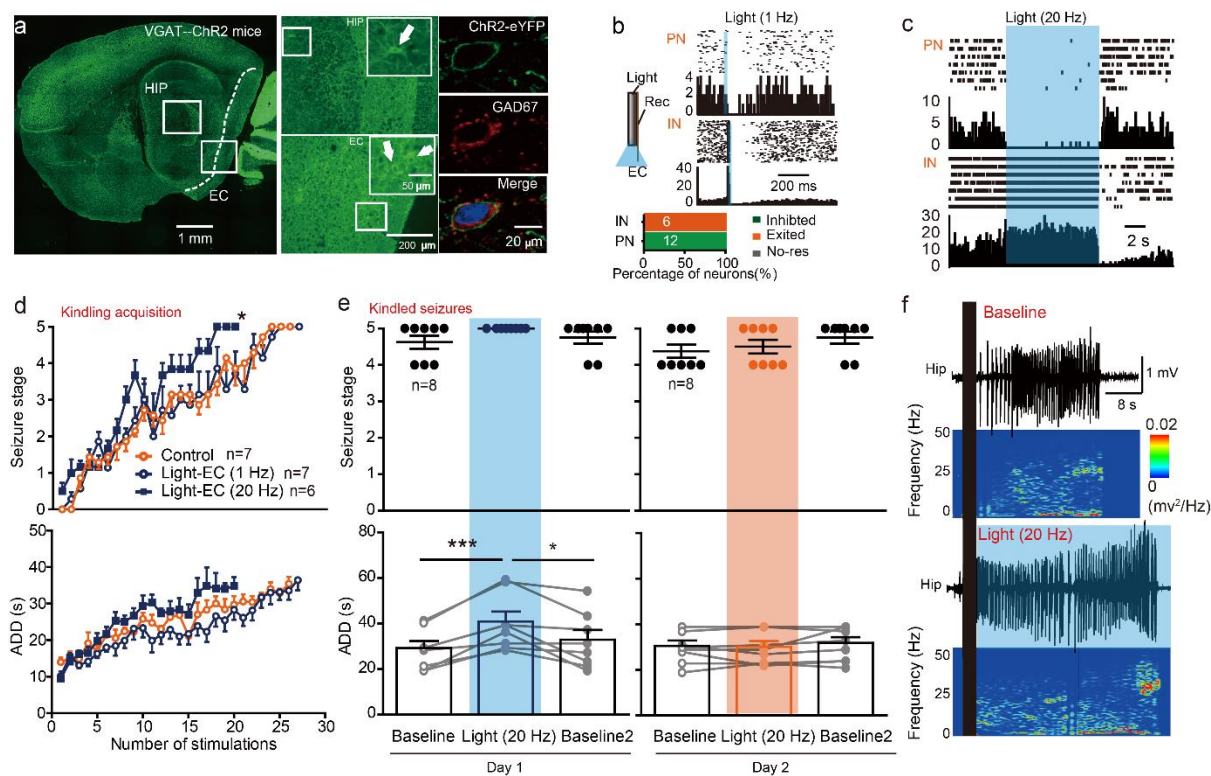

1  
2 **Fig. S5.** Activation of entorhinal GABAergic neurons promotes hippocampal seizures. a)
3 Immunohistochemical staining showing that ChR2-eYFP was expressed in GABAergic
4 neurons in *VGAT-ChR2-eYFP* mice. b) Left: schematic of the electrode design for extracellular
5 unit recording during blue light stimulation in the EC. Right: per-event rasters showing that
6 blue light stimulation (473 nm, 1 Hz) excited INs like LFES. c) Blue light stimulation (20 Hz)
7 continuously excited INs and inhibited PNs in the EC. d) Effect of entorhinal blue light
8 stimulation (1 or 20 Hz) on behavioural seizure stage of (above) and ADD (below) during
9 hippocampal kindling acquisition. \* $p < 0.05$  compared to control group (two-way ANOVA for
10 repeated measures followed by LSD *post hoc* test). Control group was received yellow light
11 stimulation (593 nm, 20 Hz). e) Effect of entorhinal blue light stimulation on seizure stage
12 (above) and ADD (below) of kindled seizures. \* $p < 0.05$ , \*\*\* $p < 0.001$  compared to baseline



- 1 (paired  $t$  test). f) Representative EEGs showing that entorhinal blue light stimulation (20 Hz)
- 2 prolonged the ADD; the black rectangle was indicated clearly as kindling stimulation.

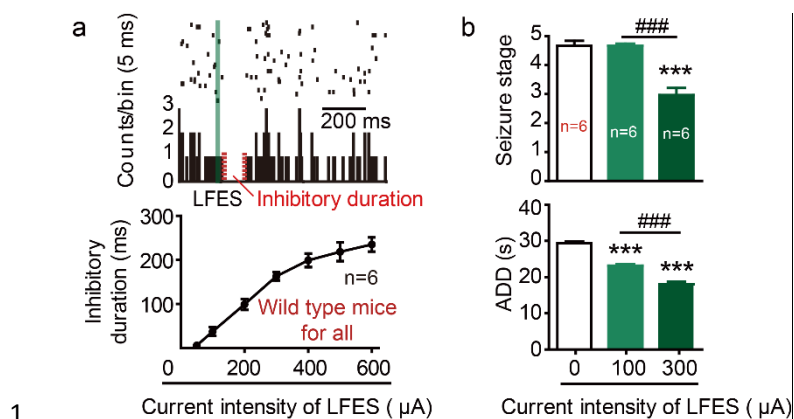

1

2 **Fig. S6.** The effect of current intensity on the inhibitory and antiepileptic effect of entorhinal

3 LFES. a) The effect of current intensity on the inhibitory duration that was induced by

4 entorhinal LFES in hippocampal neurons. b) The effect of current intensity on the antiepileptic

5 effect of LFES in kindled mice. \*\*\* $p < 0.001$  compared to the control group and ### $p < 0.001$

6 compared to the control 100  $\mu\text{A}$  group (one-way ANOVA followed by LSD *post hoc* test).

7

1

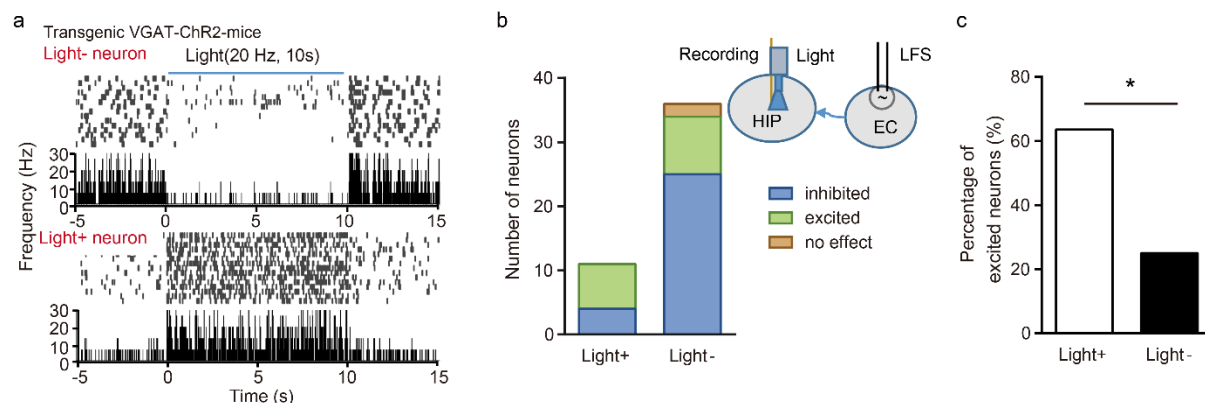

2

3 **Fig. S7.** The effect of entorhinal LFES on optogenetically identified hippocampal neurons in4 transgenic *VGAT-ChR2-eYFP* mice. a) Representative hippocampal neurons that were

5 identified by their responses to light: PNs (upper, inhibited by light; Light-) and GABAergic

6 neurons (lower, excited by light; Light+). Blue light, 200 pulses of 20 Hz blue light stimulation.

7 b) The distribution of hippocampal PNs and GABAergic neurons according to their responses

8 to LFS in the EC. c) The percentages of PNs and GABAergic neurons that were excited by

9 entorhinal LFES (more percentage population of GABAergic neurons were excited). \* $p < 0.05$ 10 ( $\chi^2$  test).

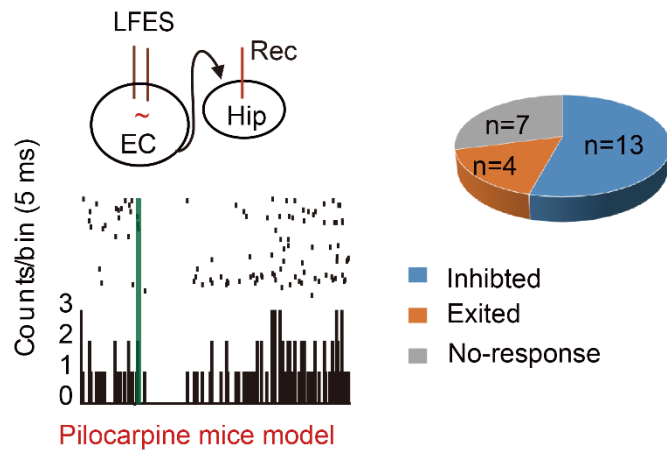

1

2 **Fig. S8.** Entorhinal LFES also had an inhibitory effect on PNs in mouse pilocarpine model of

3 epilepsy. Left: Representative Per-event rasters; Right: statistical data.

4

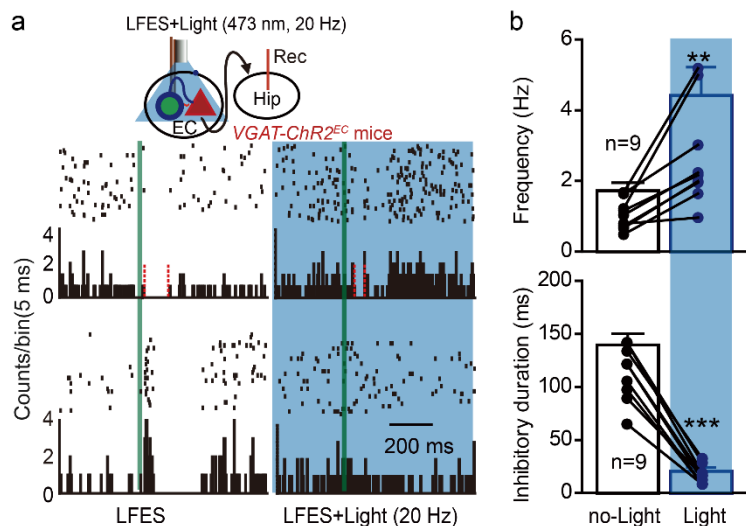

1

2 **Fig. S9.** Activation of entorhinal GABAergic neurons increases hippocampal neuronal activity

3 and attenuated the inhibitory effect of LFES. a) Representative per-event rasters showing that

4 entorhinal blue light stimulation (473 nm, 20 Hz, 5 ms per pulse) attenuated the inhibitory

5 effect of entorhinal LFES in *VGAT-eChR2<sup>EC</sup>* mice. Top plot: the effect of blue light stimulation

6 on a PNs that inhibited LFES. Bottom plot: the effect of blue light stimulation on a PNs that

7 excited LFES. b) Above: statistical data showing the effect of photo-stimulation on spiking

8 frequency in hippocampal PNs. Below: statistical data showing the effect photo-stimulation on

9 the inhibitory duration of hippocampal PNs that were induced by entorhinal LFES  $**p < 0.01$ 10 compared to the baseline (paired *t*-test).

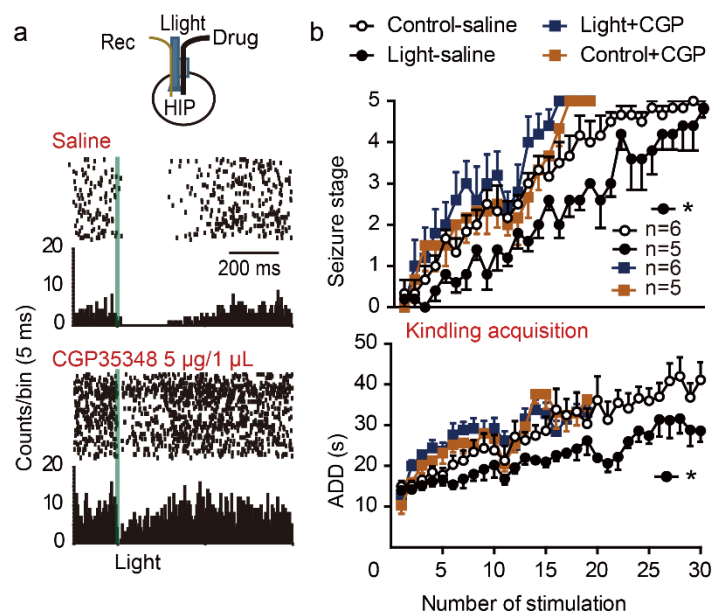

1  
 2 **Fig. S10.** GABA receptor antagonists attenuates both the inhibitory and the antiepileptic effects  
 3 of focal light stimulation. a) Representative per-event rasters showing that injection of  
 4 CGP35348 attenuated the inhibitory effect of focal photo-stimulation (473 nm, 1 Hz, 5 ms per  
 5 pulse) on hippocampal neurons. Top plot: intrahippocampal injection of saline (1 µL). Bottom  
 6 plot: Intrahippocampal injection of CGP35348 (5 µg in 1 µL). b) Intrahippocampal injection  
 7 of CGP35348 attenuated the antiepileptic effect of focal photo-stimulation (473 nm, 1 Hz, 5  
 8 ms per pulse) during kindling acquisition. Control-saline and Light-saline: Intrahippocampal  
 9 injection of saline (1 µL). Control-CGP and Light-CGP: Intrahippocampal injection of  
 10 CGP35348 (5 µg in 1 µL). The injection of the drugs was performed twice per day,  
 11 approximately every 2.5 h (during 5 kindling stimulations). \* $p < 0.05$  compared to the saline  
 12 group (two-way ANOVA for repeated measures).

13

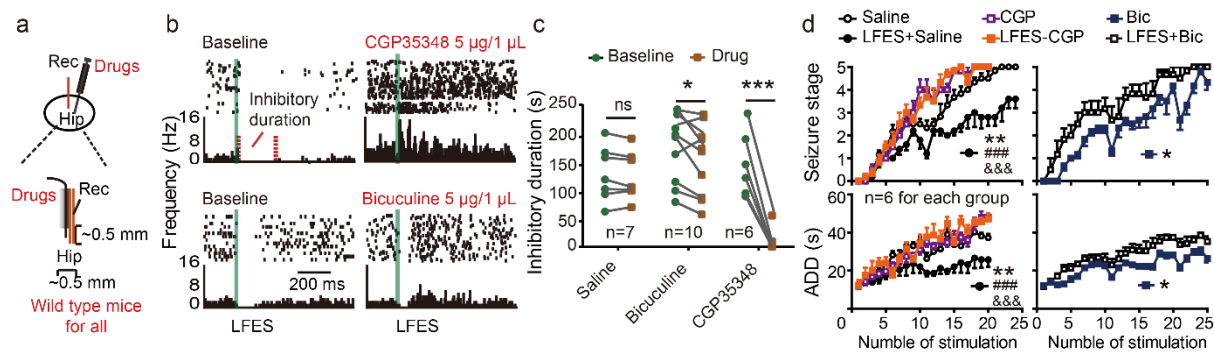

1  
 2 **Fig. S11.** GABA receptor antagonists attenuates both the inhibitory and the antiepileptic effects  
 3 of entorhinal LFES. a) The strategy to investigate whether GABA receptor antagonists would  
 4 affect the inhibitory and antiepileptic effects of entorhinal LFES. b-c) GABAergic receptor  
 5 antagonist (bicuculline or CGP35348) that was injected into the hippocampus during recording  
 6 attenuated the inhibitory effect of entorhinal LFES by reducing the duration of inhibition. b):  
 7 representative per-event rasters; c): Statistical analysis. \* $p < 0.05$  and \*\*\* $p < 0.001$  compared  
 8 to the baseline (paired t-test). d) The effect of intrahippocampal injection of CGP35348 or  
 9 bicuculline on the antiepileptic effect of entorhinal LFES in hippocampal kindling mice. \* $p <$   
 10  $0.05$  and \*\* $p < 0.001$  compared to the control group (two-way ANOVA for repeated measures  
 11 followed by LSD *post hoc* test).

12

1 **Table S1. Details about statistical tests**

| Figures | statistical object                       | method                                  | df | t, F or $\chi^2$<br>value | P      | Post hoc<br>method |
|---------|------------------------------------------|-----------------------------------------|----|---------------------------|--------|--------------------|
| Fig. 1b | Seizure stage                            | Kruskal Wallis                          | 3  | $\chi^2 = 20.470$         | <0.001 | Mann-Whitney U     |
|         | ADD                                      | Kruskal Wallis                          | 3  | $\chi^2 = 15.269$         | 0.002  | Mann-Whitney U     |
| Fig. 1c | Seizure stage                            | Two-way ANOVA                           | 2  | F = 16.950                | <0.001 | LSD                |
|         | ADD                                      | Two-way ANOVA                           | 2  | F = 4.708                 | 0.026  | LSD                |
| Fig. 1d | Seizure stage                            | Two-way ANOVA                           | 1  | F = 68.25                 | <0.001 | None               |
|         | ADD                                      | Two-way ANOVA                           | 1  | F = 24.61                 | <0.001 | None               |
| Fig. 1e | Seizure stage                            | Mann-Whitney U                          |    |                           | 0.002  | None               |
|         | ADD                                      | t test                                  | 10 | t = 3.766                 | 0.004  | none               |
| Fig. 1i | Ictal event (LFES vs LFES withheld)      | Wilcoxon matched-pairs signed rank test |    |                           | 0.031  | None               |
|         | Ictal event (control vs LFES)            | Wilcoxon Signed Rank Test               |    |                           | 0.031  | None               |
|         | Ictal event (control vs LFES withheld)   | Mann-Whitney U test                     |    |                           | 0.157  | None               |
| Fig. 1j | Interictal spike (LFES vs LFES withheld) | Paired t test                           | 5  | t = 6.574                 | 0.001  | None               |
|         | Interictal spike (control vs LFES)       | t test                                  | 10 | t = 3.177                 | 0.010  | None               |



|         |                                          |                |    |                   |        |                |
|---------|------------------------------------------|----------------|----|-------------------|--------|----------------|
|         | Interictal spike (LFES vs LFES withheld) | t test         | 10 | $t = 0.978$       | 0.351  | None           |
| Fig. 2g | Seizure stage                            | Two-way ANOVA  | 3  | $F = 25.87$       | <0.001 | LSD            |
|         | ADD                                      | Two-way ANOVA  | 3  | $F = 6.623$       | 0.002  | LSD            |
| Fig. 2h | Seizure stage                            | Two-way ANOVA  | 2  | $F = 14.027$      | <0.001 | LSD            |
|         | ADD                                      | Two-way ANOVA  | 2  | $F = 15.649$      | <0.001 | LSD            |
| Fig. 3d | PN firing rate                           | Paired t test  | 11 | $t = 5.977$       | <0.001 | None           |
|         | IN firing rate                           | Paired t test  | 7  | $t = 2.103$       | 0.074  | None           |
| Fig. 3f | Seizure stage                            | Two-way ANOVA  | 3  | $F = 38.558$      | <0.001 | LSD            |
|         | ADD                                      | Two-way ANOVA  | 3  | $F = 15.913$      | <0.001 | LSD            |
| Fig. 3g | Seizure stage                            | Kruskal Wallis | 3  | $\chi^2 = 16.515$ | <0.001 | Mann-Whitney U |
|         | ADD                                      | Kruskal Wallis | 3  | $\chi^2 = 15.562$ | <0.001 | Mann-Whitney U |
| Fig. 4c | PN firing rate                           | Paired t test  | 11 | $t = 5.121$       | <0.001 | None           |
|         | IN firing rate                           | Paired t test  | 4  | $t = 4.092$       | 0.015  | None           |
| Fig. 4d | Seizure stage                            | Two-way ANOVA  | 2  | $F = 10.816$      | <0.001 | LSD            |
|         | ADD                                      | Two-way ANOVA  | 2  | $F = 12.209$      | <0.001 | LSD            |
| Fig. 4e | Seizure stage                            | Kruskal Wallis | 4  | $\chi^2 = 30.294$ | <0.001 | Mann-Whitney U |

|          |                               |                                               |    |                   |        |                |
|----------|-------------------------------|-----------------------------------------------|----|-------------------|--------|----------------|
|          | ADD                           | One-way<br>ANOVA                              | 4  | F = 14.517        | <0.001 | LSD            |
| Fig. 5d  | Seizure stage                 | Two-way<br>ANOVA                              | 1  | F = 44.089        | <0.001 | None           |
|          | ADD                           | Two-way<br>ANOVA                              | 1  | F = 9.188         | 0.013  | None           |
| Fig. 5e  | Seizure stage                 | Wilcoxon<br>matched-pairs<br>signed rank test |    |                   | 0.063  | None           |
|          | ADD                           | Paired t test                                 | 6  | t = 4.664         | 0.004  | None           |
| Fig. 6c  | Number of excited IN          | $\chi^2$                                      | 1  | $\chi^2 = 14.320$ | <0.001 | None           |
|          | Number of excited IN          | $\chi^2$                                      | 1  | $\chi^2 = 8.505$  | 0.004  | None           |
| Fig. 6d  | Number of excited IN          | $\chi^2$                                      | 1  | $\chi^2 = 1.182$  | 0.277  | None           |
| Fig. 6e  | Inhibitory duration           | Paired t test                                 | 7  | t = 4.004         | 0.005  | None           |
| Fig. 6f  | PN firing rate                | Paired t test                                 | 13 | t = 3.849         | 0.002  | None           |
|          | IN firing rate                | Paired t test                                 | 7  | t = 1.738         | 0.126  | None           |
| Fig. 7c  | Seizure stage                 | Kruskal Wallis                                | 4  | 20.045            | <0.001 | Mann-Whitney U |
|          | ADD                           | One-way<br>ANOVA                              | 4  | F = 4.979         | 0.003  | LSD            |
| Fig. 7f  | Percentage of excited neurons | $\chi^2$                                      | 1  | $\chi^2 = 11.03$  | 0.001  | None           |
| Fig. S4a | Contextual fear memory        | One-way<br>ANOVA                              | 3  | F = 3.572         | 0.024  | LSD            |
|          | Cured fear memory             | One-way<br>ANOVA                              | 3  | F = 3.315         | 0.031  | LSD            |
| Fig. S4b | Passive Avoidance (test)      | One-way<br>ANOVA                              | 3  | F = 12.100        | <0.001 | LSD            |

|          |                                |                                |   |           |         |      |
|----------|--------------------------------|--------------------------------|---|-----------|---------|------|
| Fig. S4c | Novel recognition              | Paired t test                  | 9 | t = 2.522 | 0.033   | None |
|          | (Sham-Control)                 |                                |   |           |         |      |
|          | Novel recognition              | Paired t test                  | 9 | t = 0.128 | 0.901   | None |
|          | ( Kindled-LFES EC)             |                                |   |           |         |      |
| Fig. S4c | Spatial recognition            | Paired t test                  | 9 | t = 4.076 | 0.003   | None |
|          | (Sham-Control)                 |                                |   |           |         |      |
|          | Spatial recognition            | Paired t test                  | 9 | t = 3.022 | 0.014   | None |
|          | (Kindled-LFES EC)              |                                |   |           |         |      |
| Fig. S5d | Seizure stage                  | Two-way ANOVA                  | 2 | F = 4.087 | 0.036   | LSD  |
|          | ADD                            | Two-way ANOVA                  | 2 | F = 4.554 | 0.026   | LSD  |
| Fig. S5e | Seizure stage (day 1)          | Wilcoxon                       |   |           | 0.250   | None |
|          | Baseline                       | matched-pairs signed rank test |   |           |         |      |
|          | Baseline2                      | Wilcoxon                       |   |           | 0.500   | None |
|          |                                | matched-pairs signed rank test |   |           |         |      |
|          | ADD (day 1)                    | Paired t test                  | 7 | t = 5.921 | <0.001  | None |
|          | Baseline                       |                                |   |           |         |      |
|          | Baseline2                      | Paired t test                  | 7 | t = 3.147 | 0.016   | None |
|          | Seizure stage (day 2)          | Wilcoxon                       |   |           | > 0.999 | None |
|          | Baseline                       | matched-pairs signed rank test |   |           |         |      |
|          | Baseline2                      | Wilcoxon                       |   |           | 0.500   | None |
|          | matched-pairs signed rank test |                                |   |           |         |      |
|          | ADD (day 2)                    | Paired t test                  | 7 | t = 0.331 | 0.750   | None |

---

|           |                                   |                |   |                   |        |                |
|-----------|-----------------------------------|----------------|---|-------------------|--------|----------------|
|           | Baseline                          |                |   |                   |        |                |
|           | Baseline2                         | Paired t test  | 7 | t = 1.217         | 0.263  | None           |
| Fig. S6b  | Seizure stage                     | Kruskal Wallis | 2 | $\chi^2 = 10.451$ | <0.001 | Mann-Whitney U |
|           | ADD                               | One-way ANOVA  | 2 | F = 105.300       | <0.001 | LSD            |
| Fig. S7c  | Percentage of excited neurons     | $\chi^2$       | 1 | $\chi^2 = 5.601$  | 0.018  | None           |
| Fig. S8b  | Frequency                         | Paired t test  | 8 | t = 4.122         | 0.003  | None           |
|           | Inhibitory duration               | Paired t test  | 8 | t = 13.93         | <0.001 | None           |
| Fig. S10b | Seizure stage                     | Two-way ANOVA  | 3 | F = 6.435         | 0.004  | LSD            |
|           | ADD                               | Two-way ANOVA  | 3 | F = 3.797         | 0.029  | LSD            |
| Fig. S11c | Inhibitory duration (saline)      | Paired t test  | 6 | t = 1.044         | 0.337  | None           |
|           | Inhibitory duration (bicuculline) | Paired t test  | 9 | t = 2.438         | 0.038  | None           |
|           | Inhibitory duration (CGP35348)    | Paired t test  | 5 | t = 8.49          | <0.001 | None           |
| Fig. S11d | Seizure stage (left)              | Two-way ANOVA  | 3 | F = 14.679        | <0.001 | LSD            |
|           | ADD (left)                        | Two-way ANOVA  | 3 | F = 6.798         | 0.003  | LSD            |
|           | Seizure stage (right)             | Two-way ANOVA  | 1 | F = 7.53          | 0.021  | None           |
|           | ADD (right)                       | Two-way ANOVA  | 1 | F = 9.906         | 0.010  | None           |

---

---

## 1 **References**

- 2 Alexander, G.M., Rogan, S.C., Abbas, A.I., Armbruster, B.N., Pei, Y., Allen, J.A., Nonneman,  
3 R.J., Hartmann, J., Moy, S.S., Nicoletis, M.A., McNamara, J.O., Roth, B.L, 2009. Remote  
4 control of neuronal activity in transgenic mice expressing evolved G protein-coupled receptors.  
5 *Neuron* 63, 27-39.
- 6 Favrais, G., van de Looij, Y., Fleiss, B., Ramanantsoa, N., Bonnin, P., Stoltenburg-Didinger,  
7 G., Lacaud, A., Saliba, E., Dammann, O., Gallego, J., *et al.*, 2011. Systemic inflammation  
8 disrupts the developmental program of white matter. *Annals of neurology* 70, 550-565.
- 9 King, S.L., Marks, M.J., Grady, S.R., Caldarone, B.J., Koren, A.O., Mukhin, A.G., Collins,  
10 A.C., and Picciotto, M.R., 2003. Conditional expression in corticothalamic efferents reveals a  
11 developmental role for nicotinic acetylcholine receptors in modulation of passive avoidance  
12 behavior. *The Journal of neuroscience: the official journal of the Society for Neuroscience* 23,  
13 3837-3843.
- 14 Kinnavane, L., Amin, E., Olarte-Sánchez, C.M., Aggleton, J.P., 2016. Detecting and  
15 discriminating novel objects: The impact of perirhinal cortex disconnection on hippocampal  
16 activity patterns. *Hippocampus*. 26:1393-1413
- 17 Liu, L., Zhang, S., Zhu, Y., Fu, Q., Zhu, Y., Gong, Y., Ohtsu, H., Luo, J., Wei, E., and Chen,  
18 Z., 2007. Improved learning and memory of contextual fear conditioning and hippocampal  
19 CA1 long-term potentiation in histidine decarboxylase knock-out mice. *Hippocampus* 17, 634-  
20 641.
- 21 Paxinos, G., and Franklin, K., 2001. *The Mouse Brain in Stereotaxic Coordinates*, Second

- 
- 1 Edition edn (San Diego: Academic Press).
- 2 Paxinos, G., and Watson, C., eds., 2004. *The Rat Brain in Stereotaxic Coordinates* (New York:  
3 Academic Press).
- 4 Tonnesen, J., Sorensen, A.T., Deisseroth, K., Lundberg, C., and Kokaia, M, 2009. Optogenetic  
5 control of epileptiform activity. *Proceedings of the National Academy of Sciences of the*  
6 *United States of America* *106*, 12162-12167.
- 7 Wang, Y., Liang, J., Xu, C., Wang, Y., Kuang, Y., Xu, Z., Guo, Y., Wang, S., Gao, F., and  
8 Chen, Z., 2016. Low-frequency stimulation in anterior nucleus of thalamus alleviates kainate-  
9 induced chronic epilepsy and modulates the hippocampal EEG rhythm. *Experimental*  
10 *neurology* *276*, 22-30.
